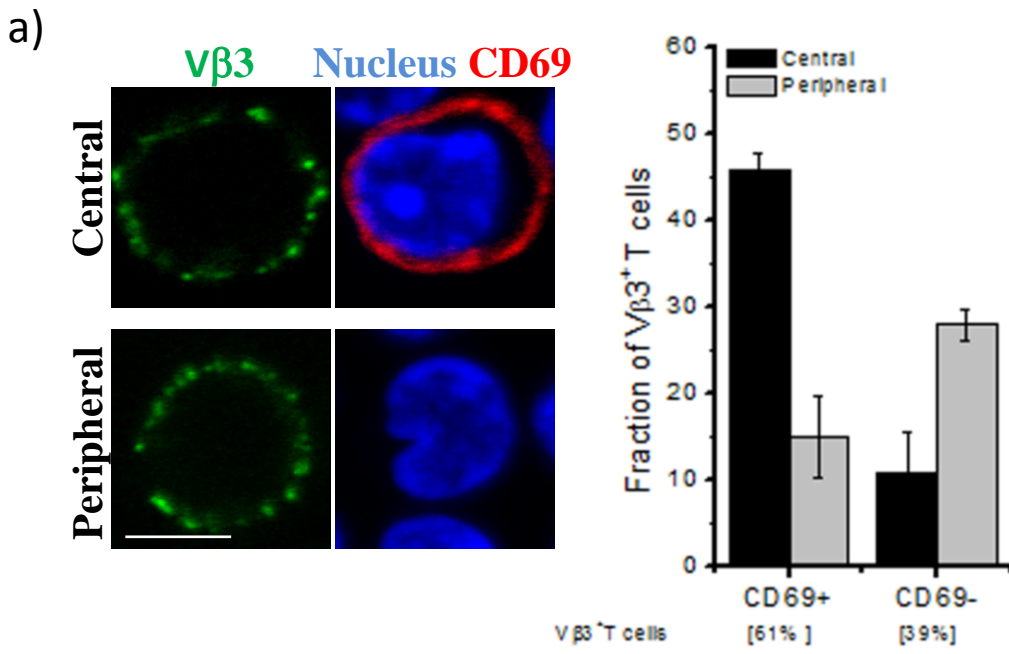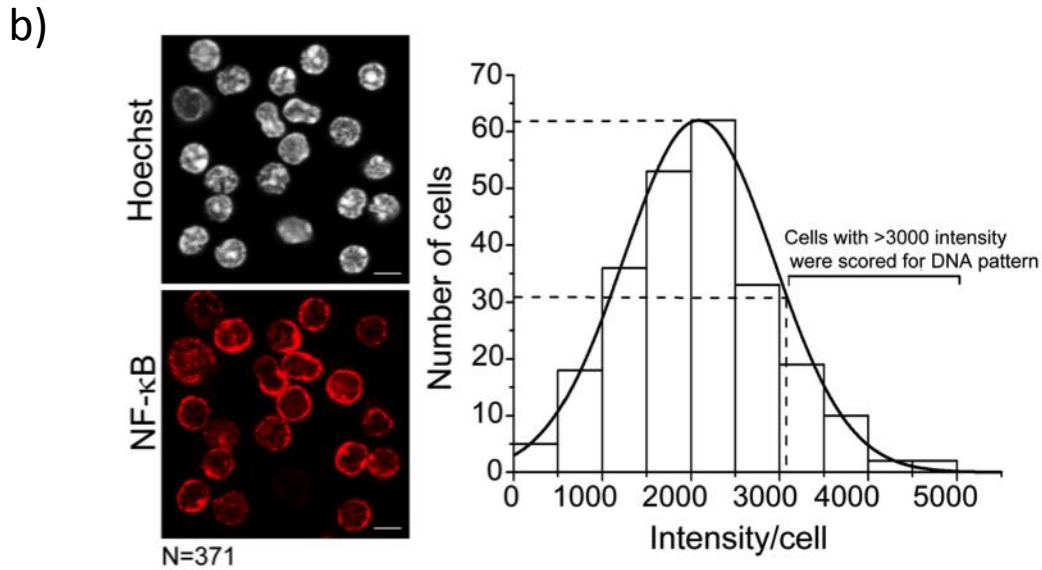

**Figure S3. Heterogeneity in DNA patterns influences early activation and gene expression.**
