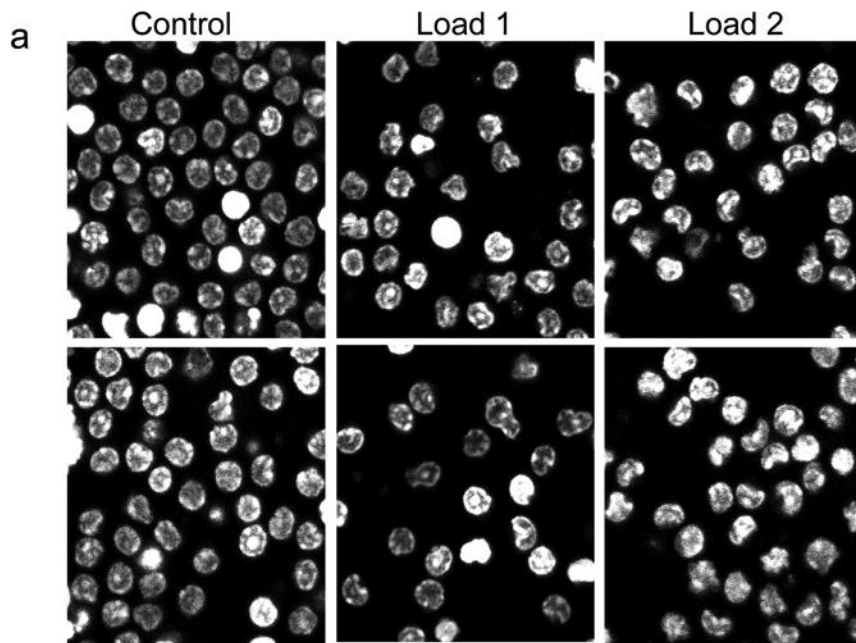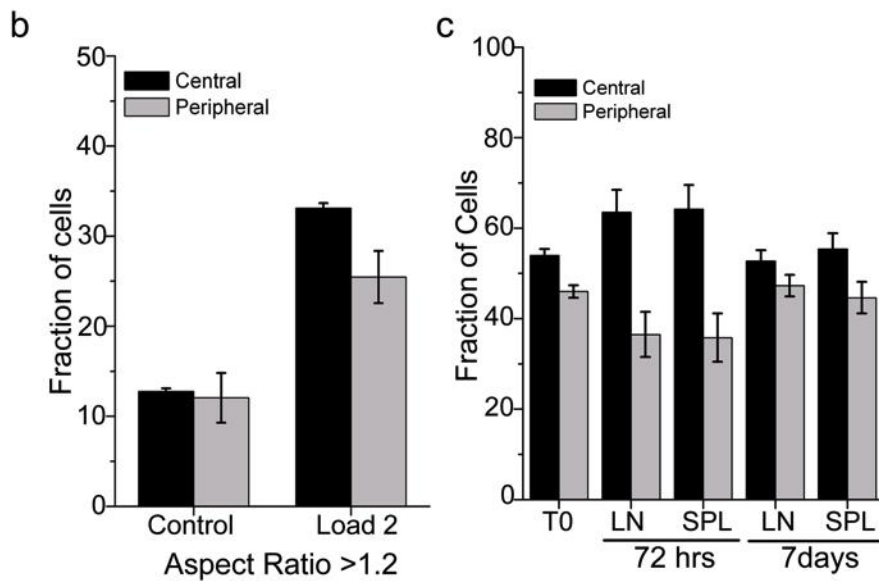

Figure S8(i) **Implications of heterogeneity in DNA patterns on naive T-cells functions.**

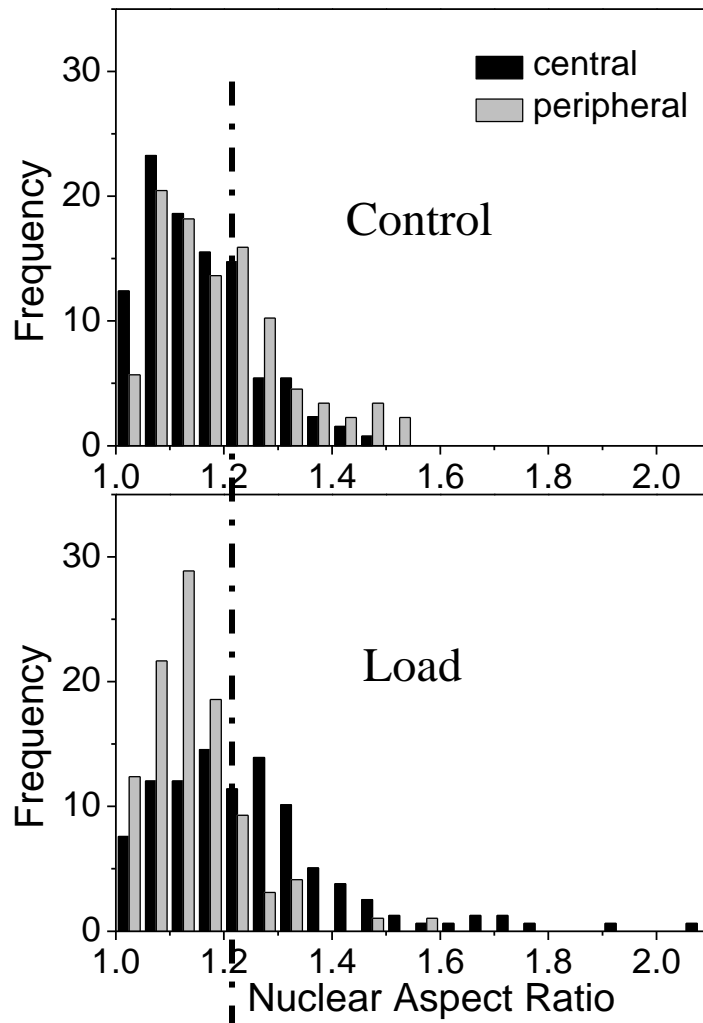

Figure S8(ii) **Implications of heterogeneity in DNA patterns on naive T-cells functions.**

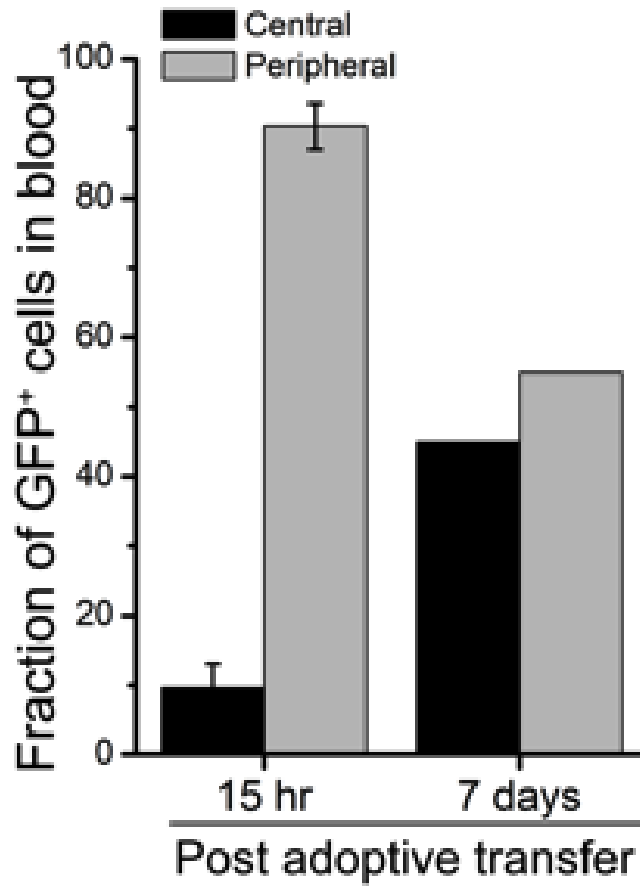

Figure S8(iii) **Implications of heterogeneity in DNA patterns on naive T-cells functions.**
