# Supplementary material for: Developmental Heterogeneity in DNA Packaging Patterns Influences T-Cell Activation and Transmigration
Source: PubMed Central journal article supplement (PMC3434176; doi:10.1371/journal.pone.0043718), 2012-09-05
Supplement: pone.0043718.s001.pdf [file pone.0043718.s001.pdf]

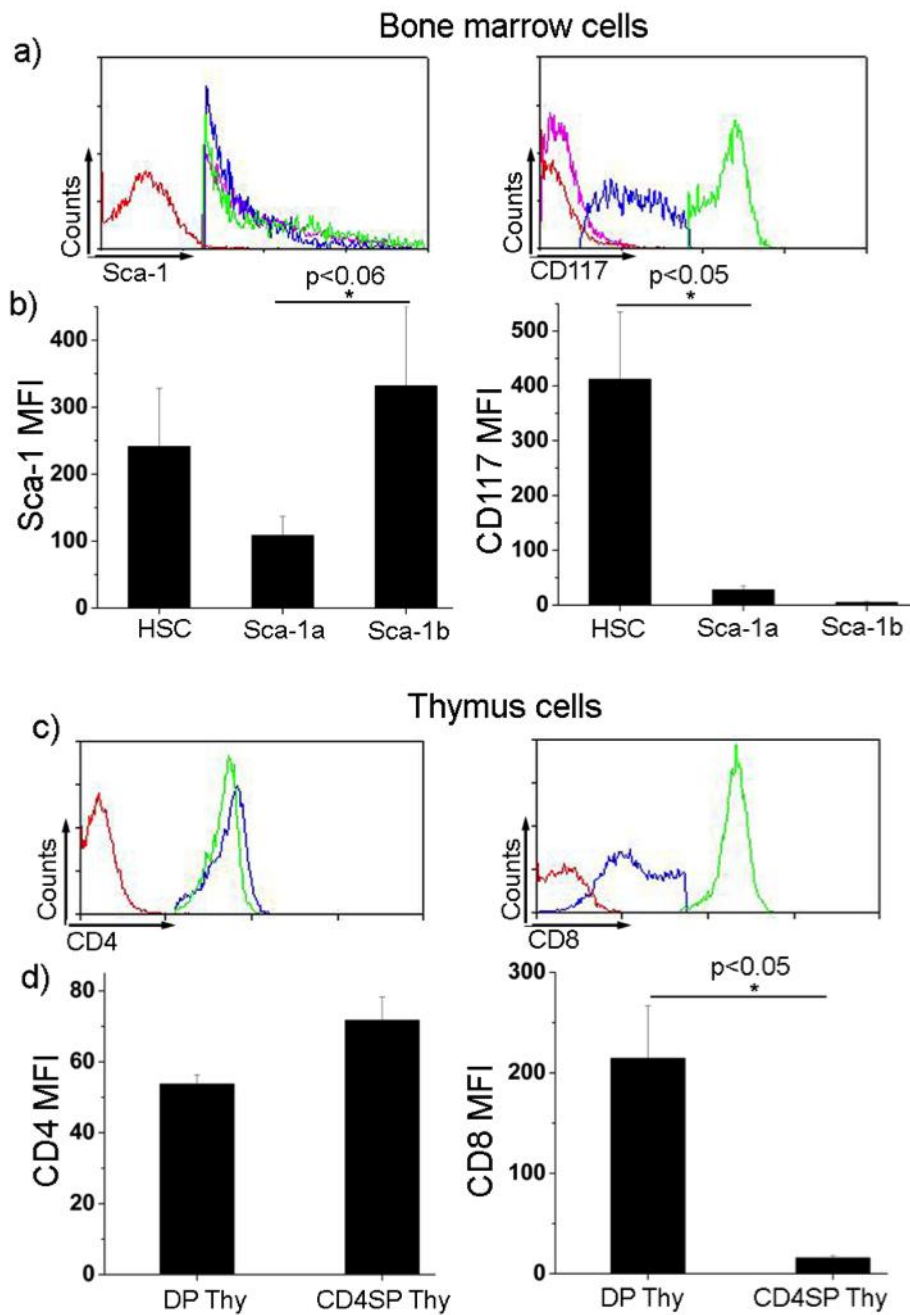

**Figure S1 Characterization of surface markers for bone marrow and thymic cells.**
