# Supplementary material for: Developmental Heterogeneity in DNA Packaging Patterns Influences T-Cell Activation and Transmigration
Source: PubMed Central journal article supplement (PMC3434176; doi:10.1371/journal.pone.0043718), 2012-09-05
Supplement: pone.0043718.s002.pdf [file pone.0043718.s002.pdf]

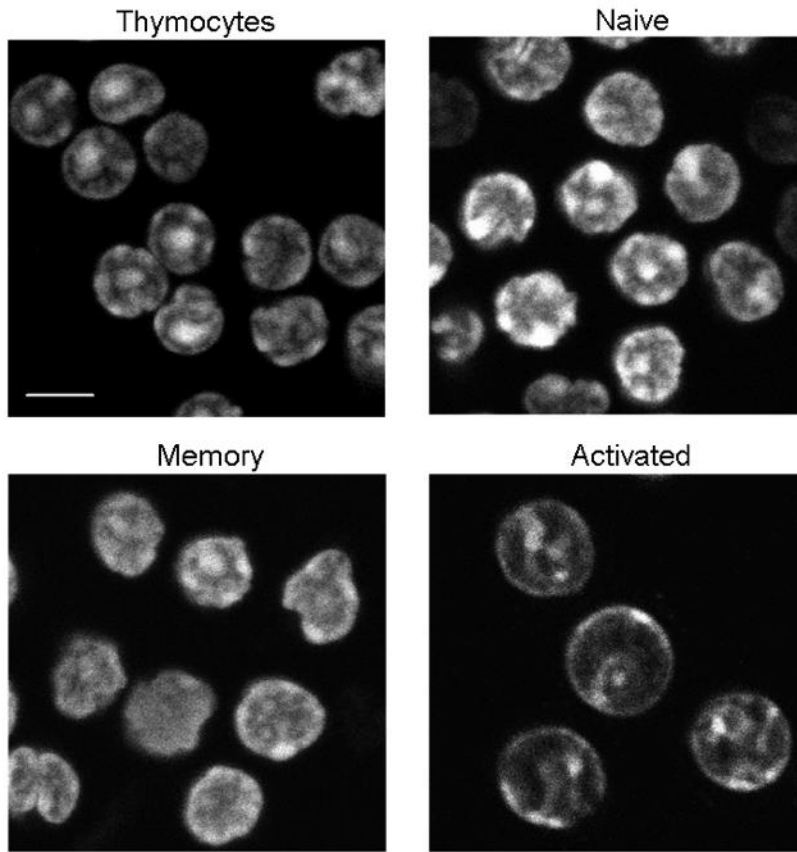

**Figure S2(i). Confirmation of heterochromatin patterns in T-cells by labelling various markers.**

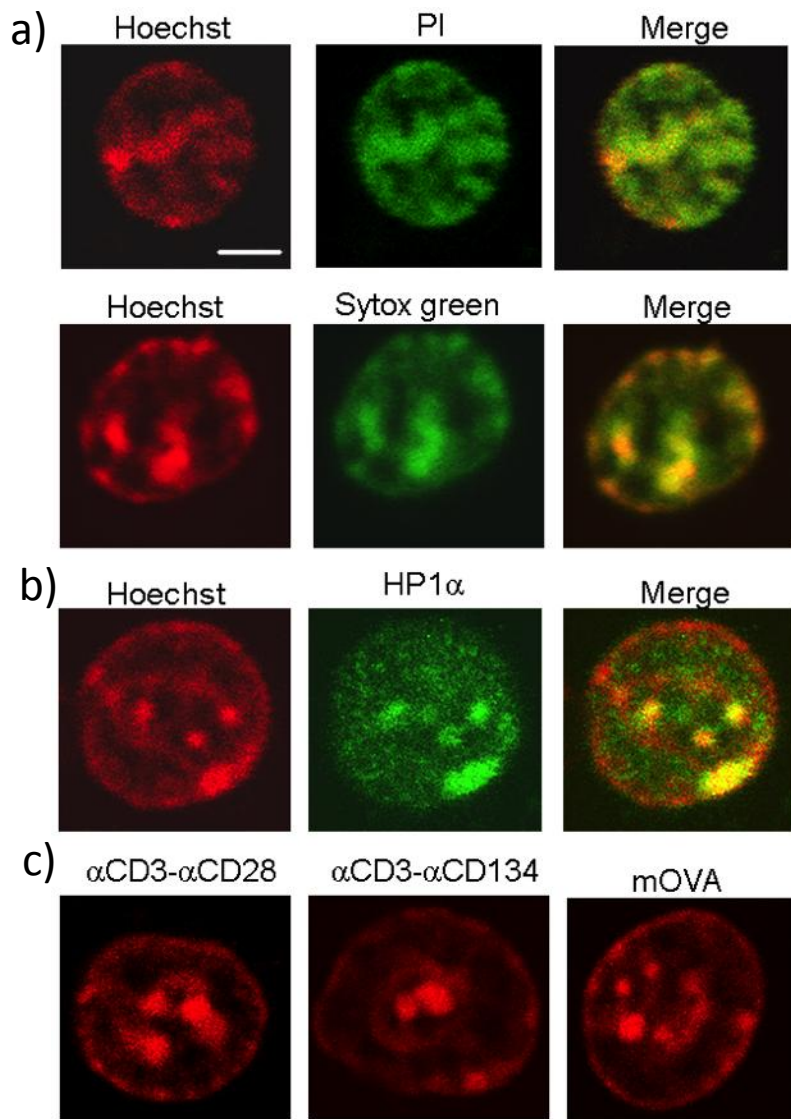

Figure S2(ii). Confirmation of heterochromatin patterns in T-cells by labelling various markers.

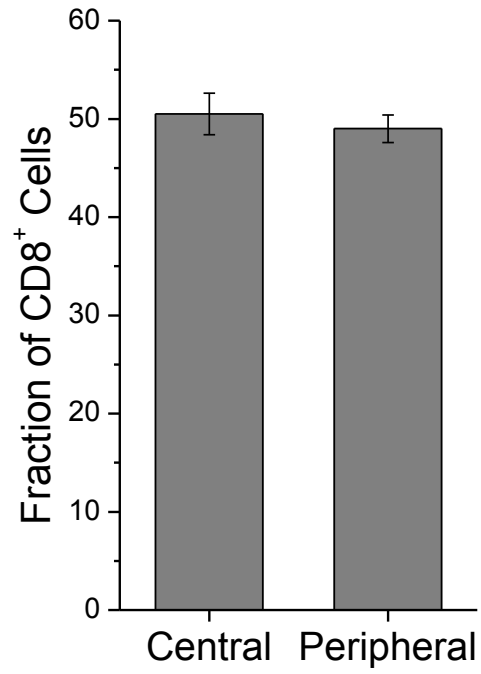

**Figure S2(iii). Confirmation of heterochromatin patterns in T-cells by labelling various markers.**

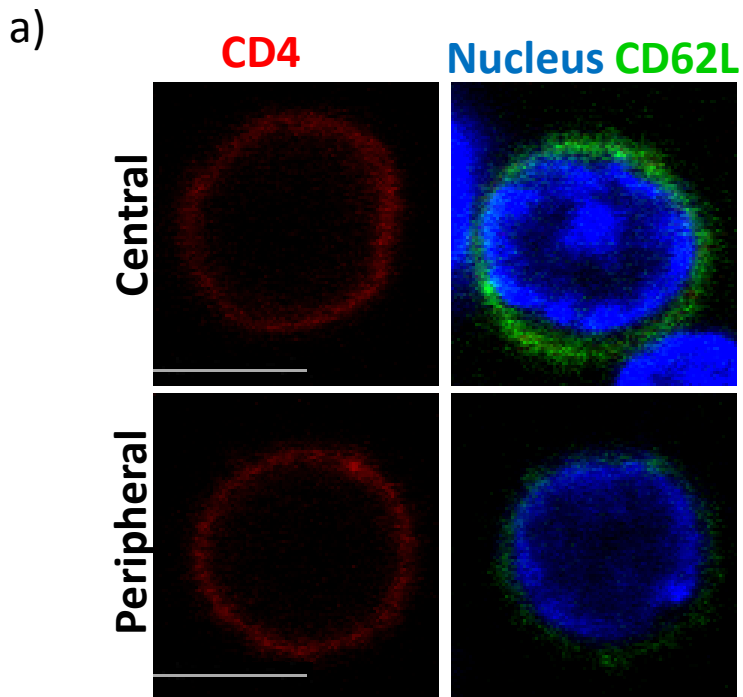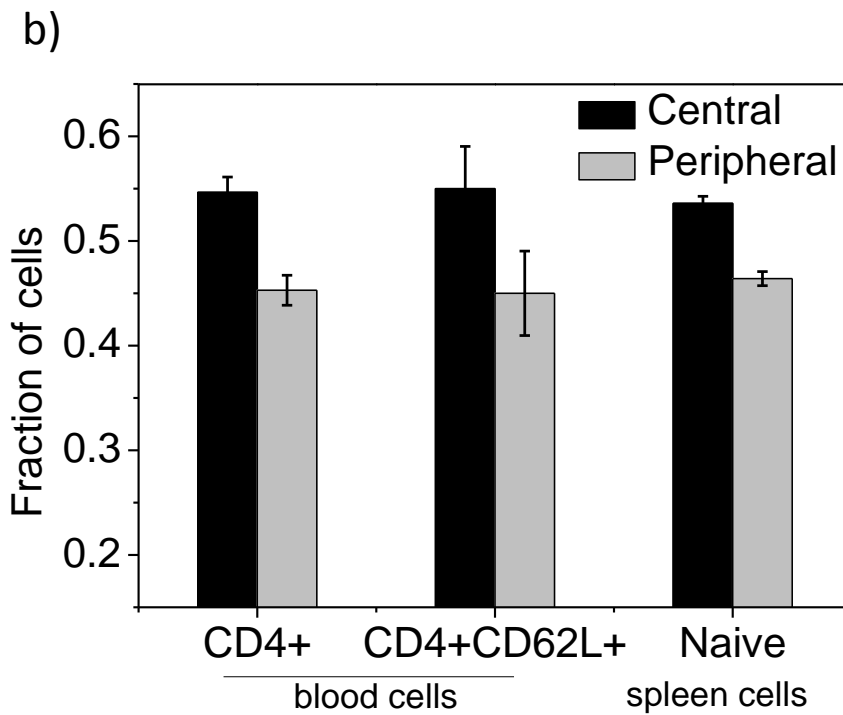

Figure S2(iv). **Confirmation of heterochromatin patterns in T-cells by labelling various markers.**
