# Supplementary material for: Developmental Heterogeneity in DNA Packaging Patterns Influences T-Cell Activation and Transmigration
Source: PubMed Central journal article supplement (PMC3434176; doi:10.1371/journal.pone.0043718), 2012-09-05
Supplement: pone.0043718.s005.pdf [file pone.0043718.s005.pdf]

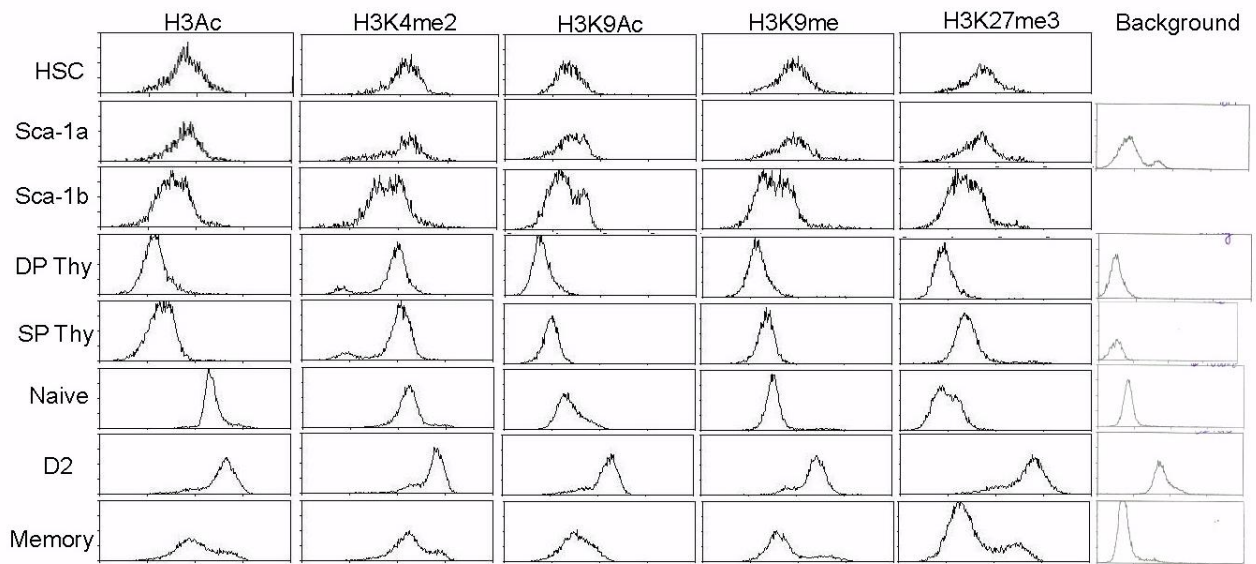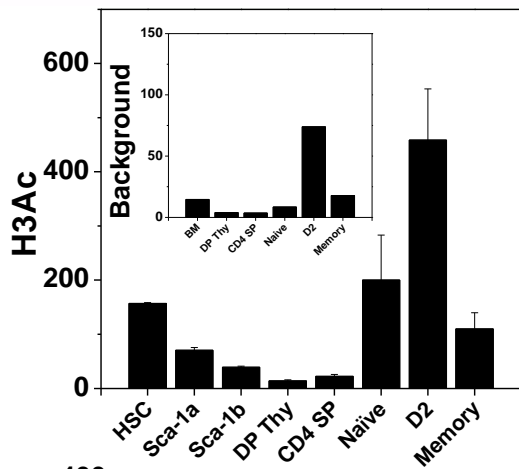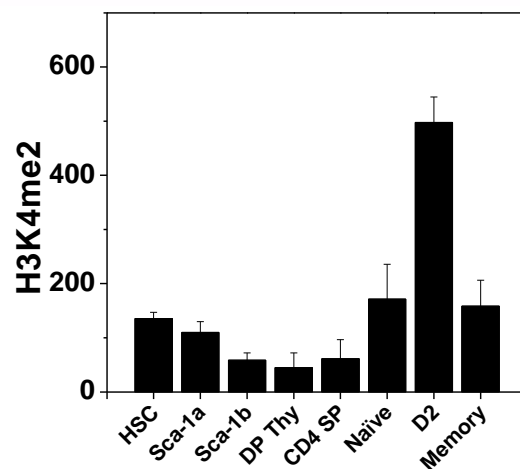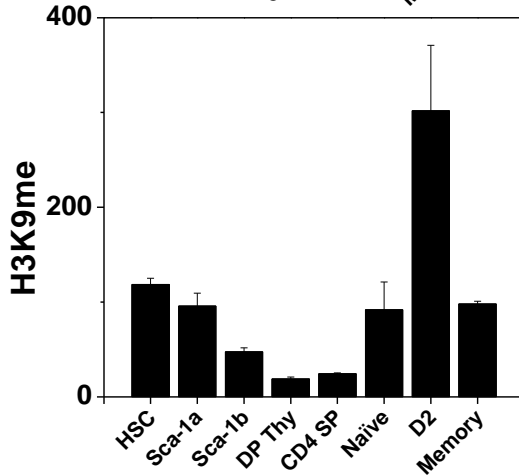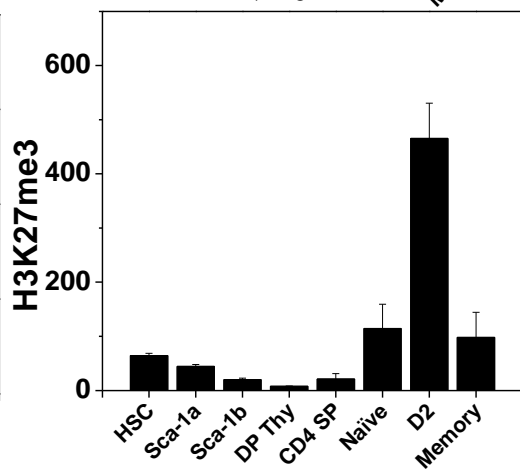

Figure S5(i). **Histone modifications changes during T-cell development.**

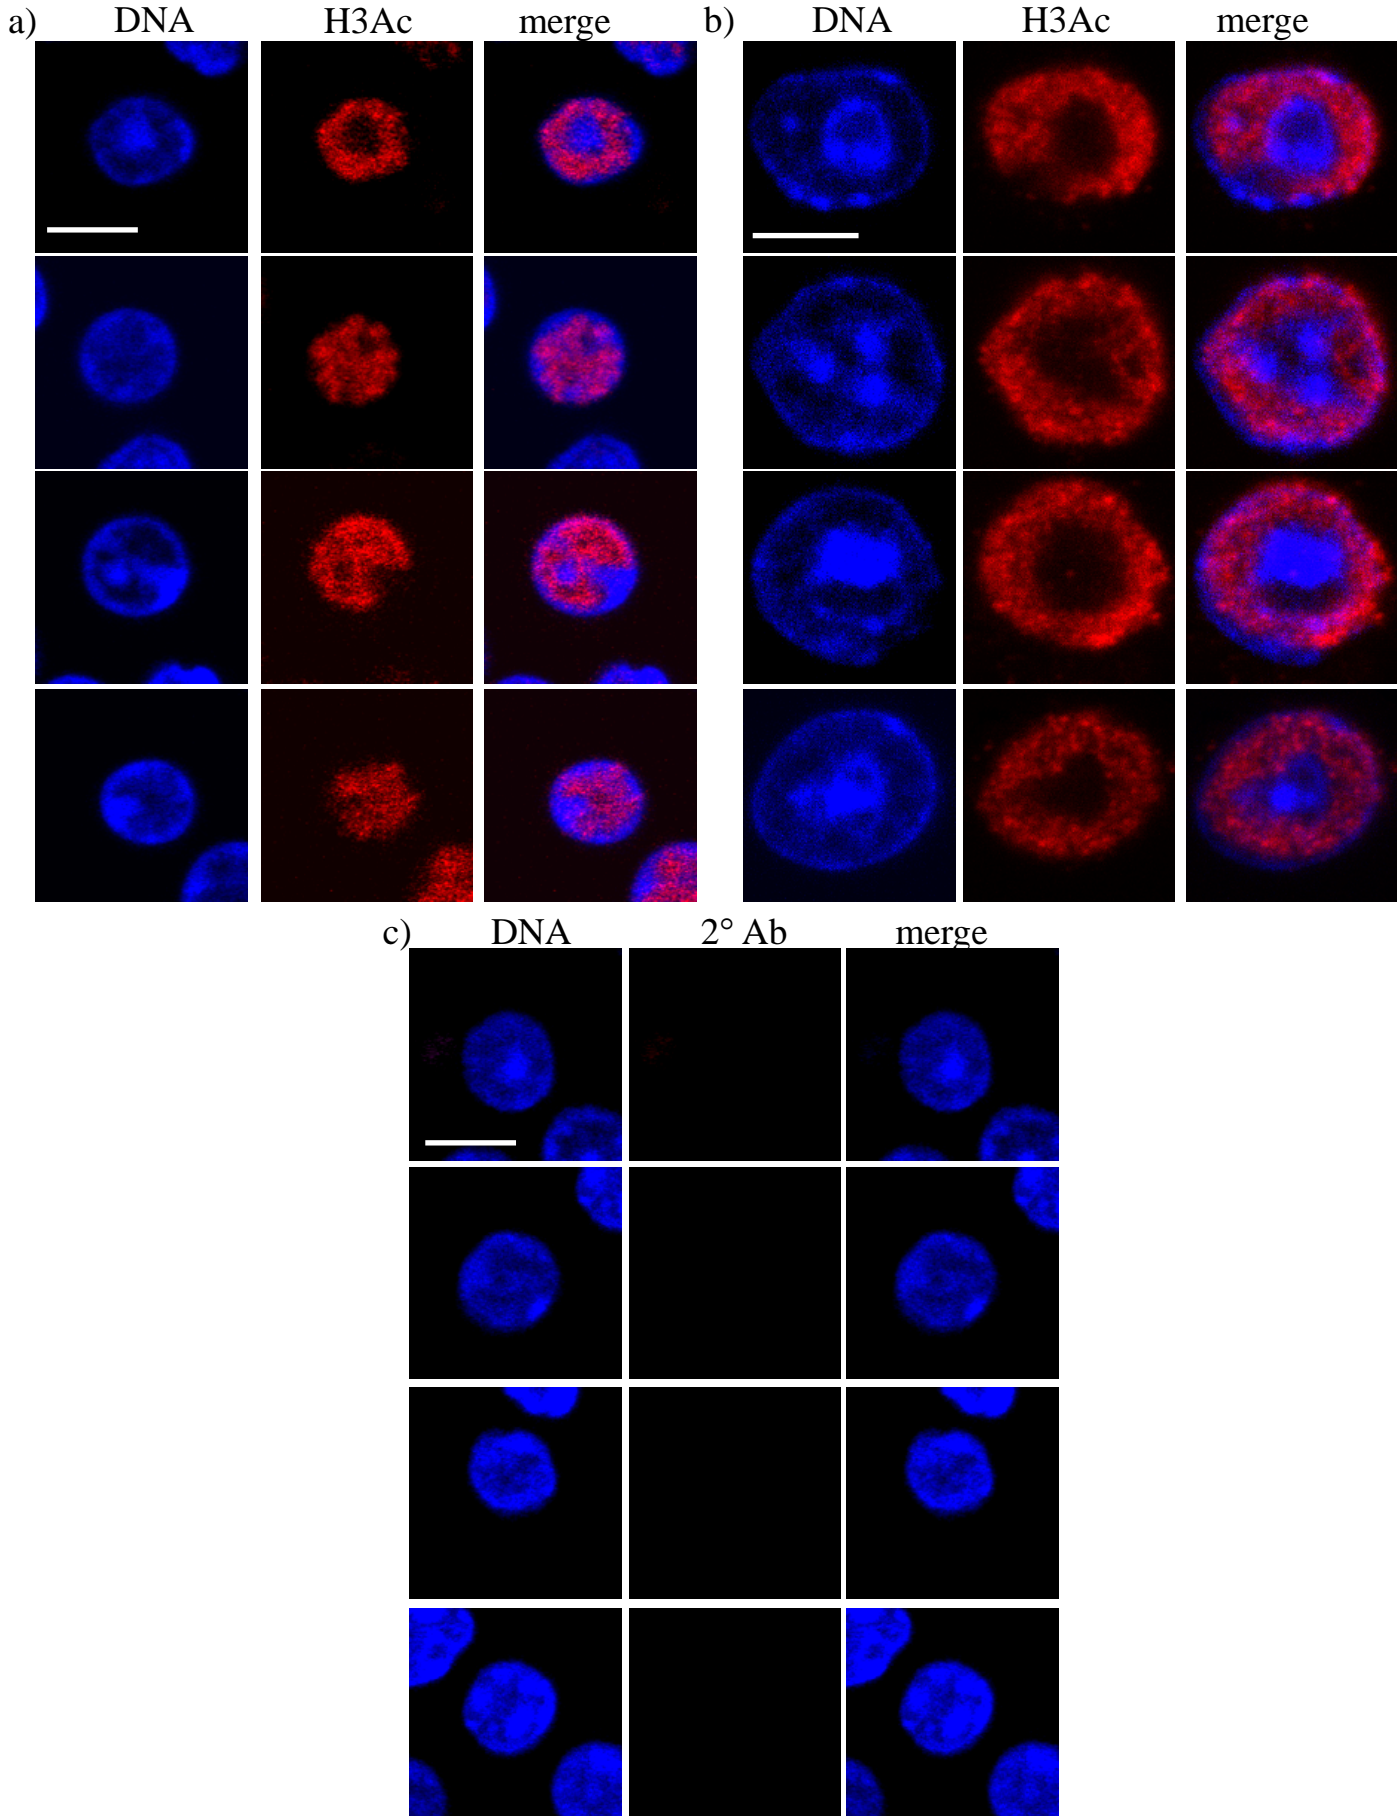

Figure S5(ii). **Histone modifications changes during T-cell development.**

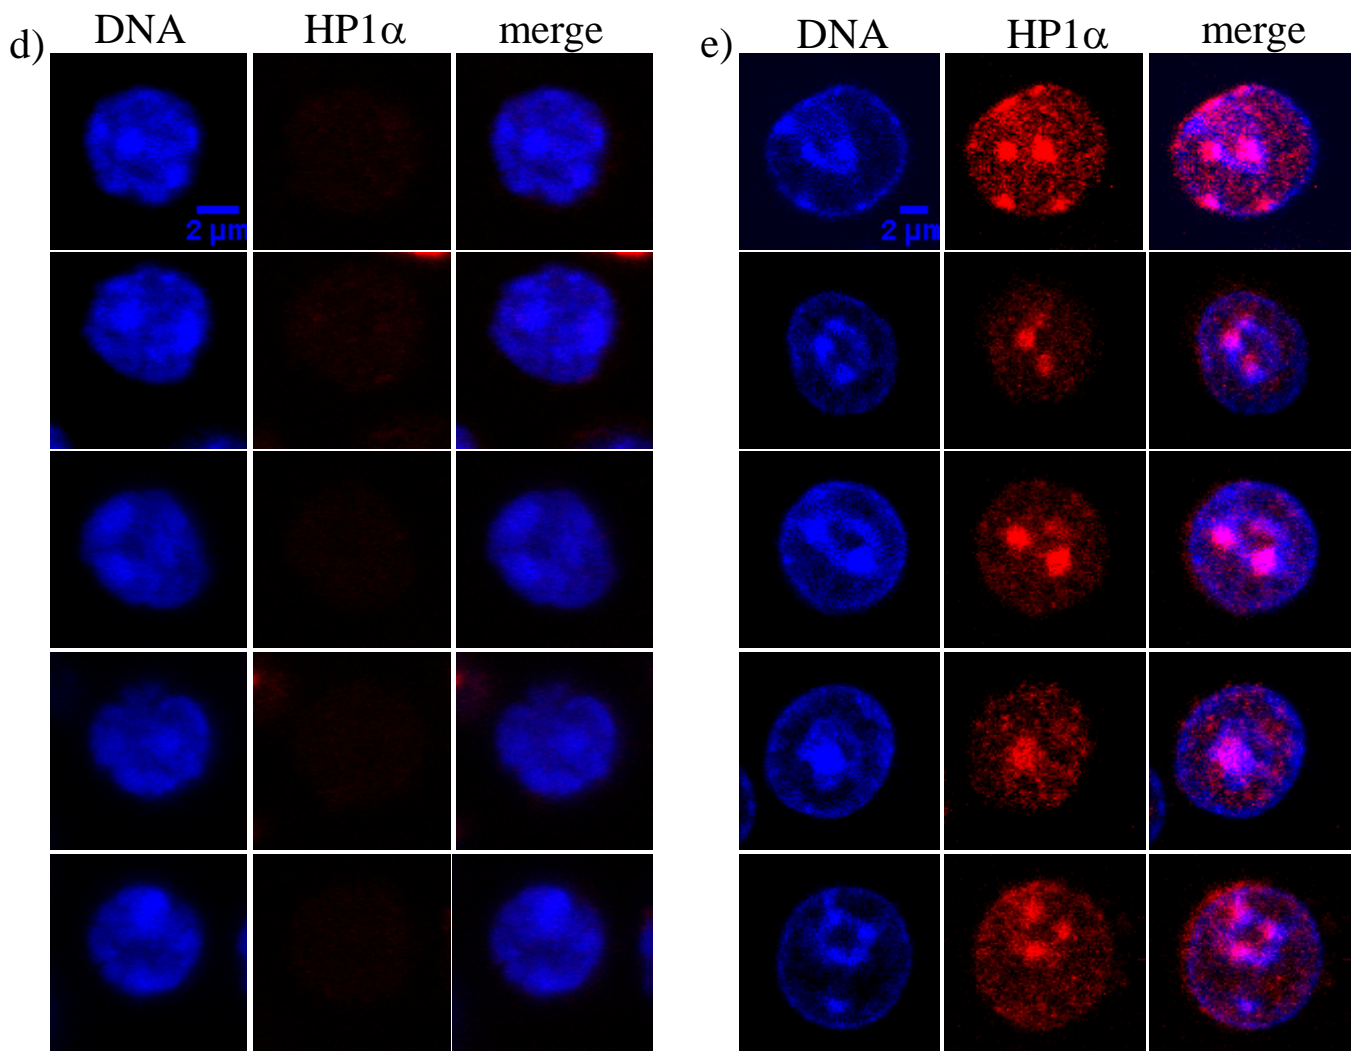

Figure S5(ii). **Histone modifications changes during T-cell development.**

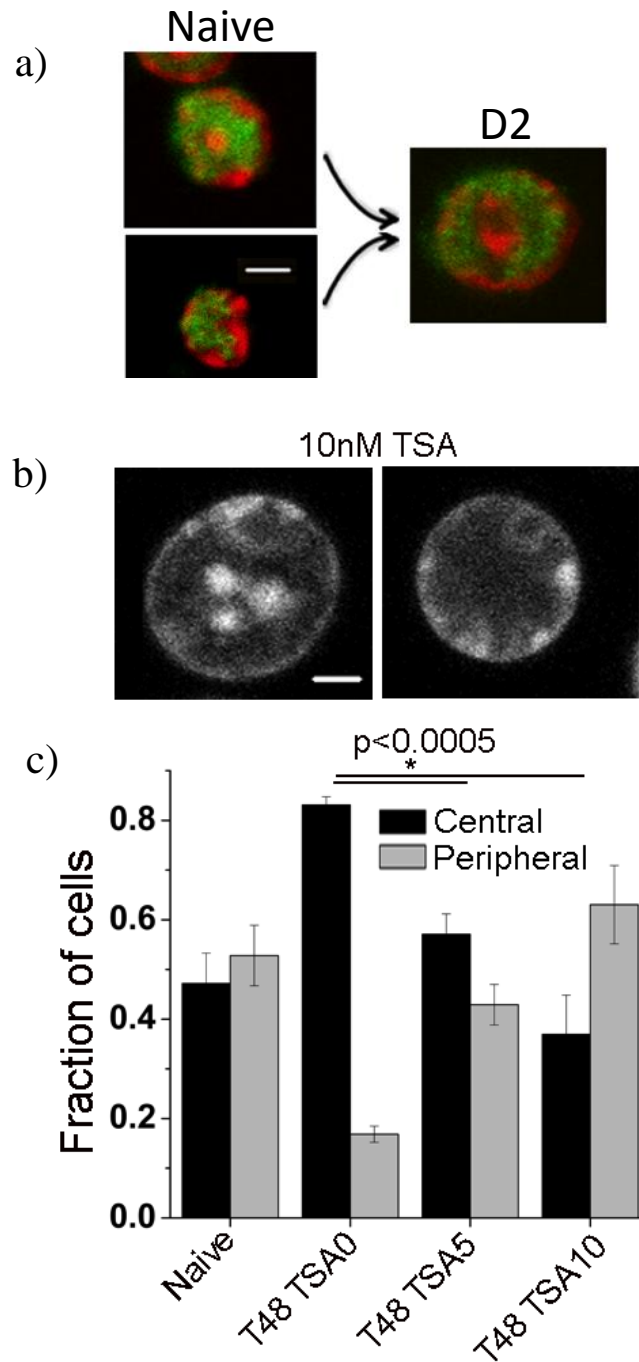

Figure S5(iii). **Histone modifications changes during T-cell development.**
