# Supplementary material for: Developmental Heterogeneity in DNA Packaging Patterns Influences T-Cell Activation and Transmigration
Source: PubMed Central journal article supplement (PMC3434176; doi:10.1371/journal.pone.0043718), 2012-09-05
Supplement: pone.0043718.s007.pdf [file pone.0043718.s007.pdf]

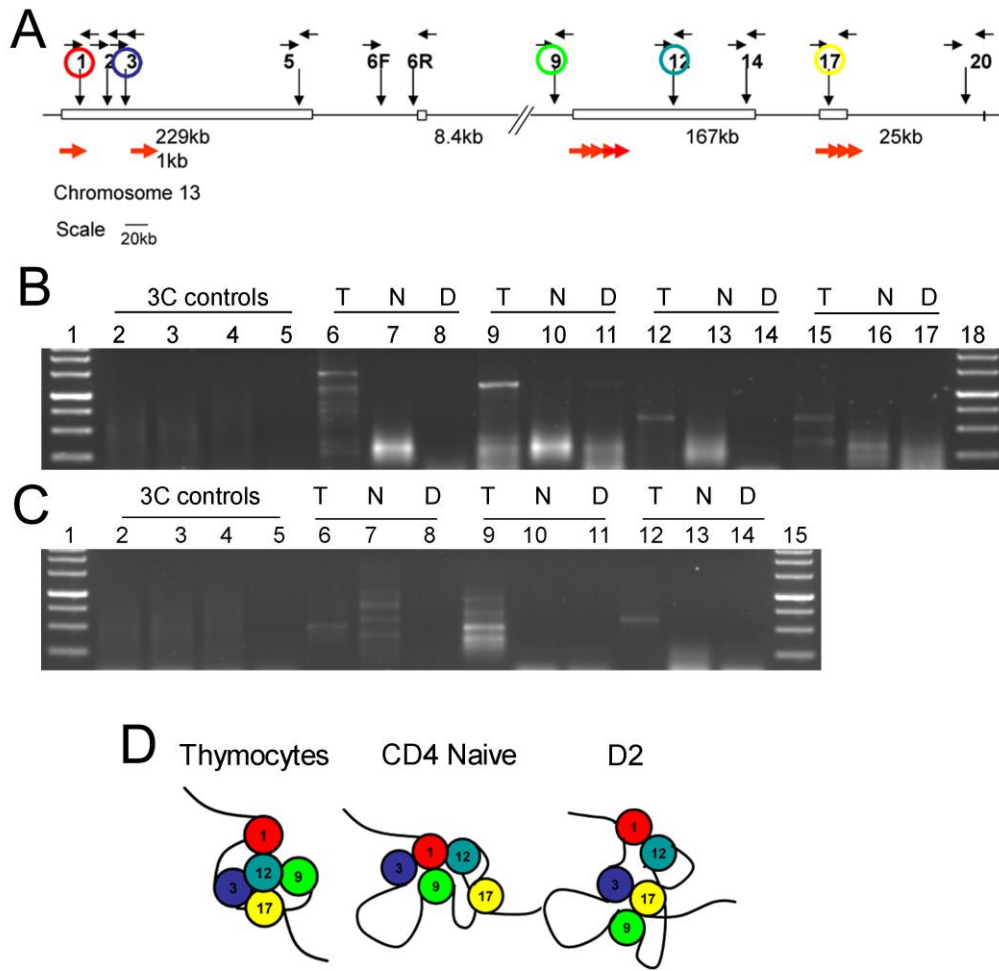

Figure S7(i). **3C analysis of histone gene cluster during T-cell development.**

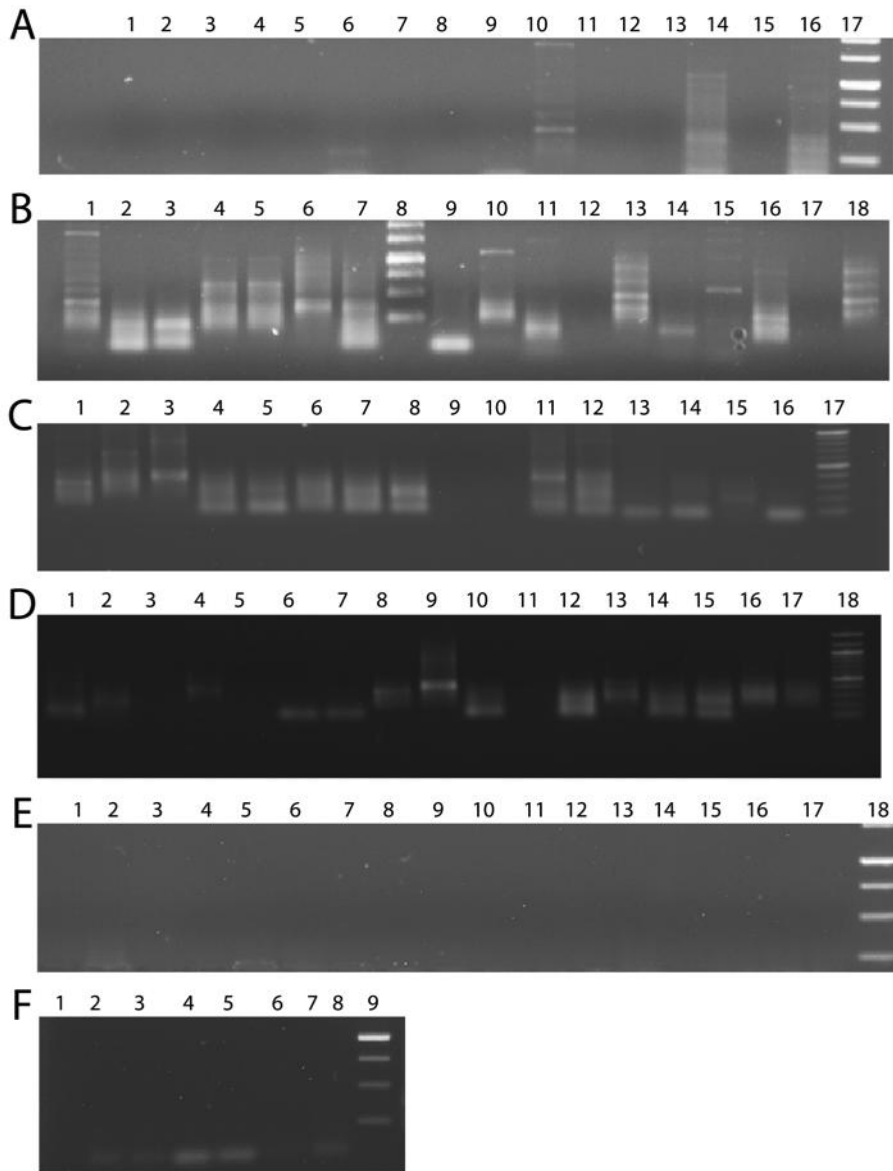

Figure S7(ii). **3C analysis of histone gene cluster during T-cell development.**

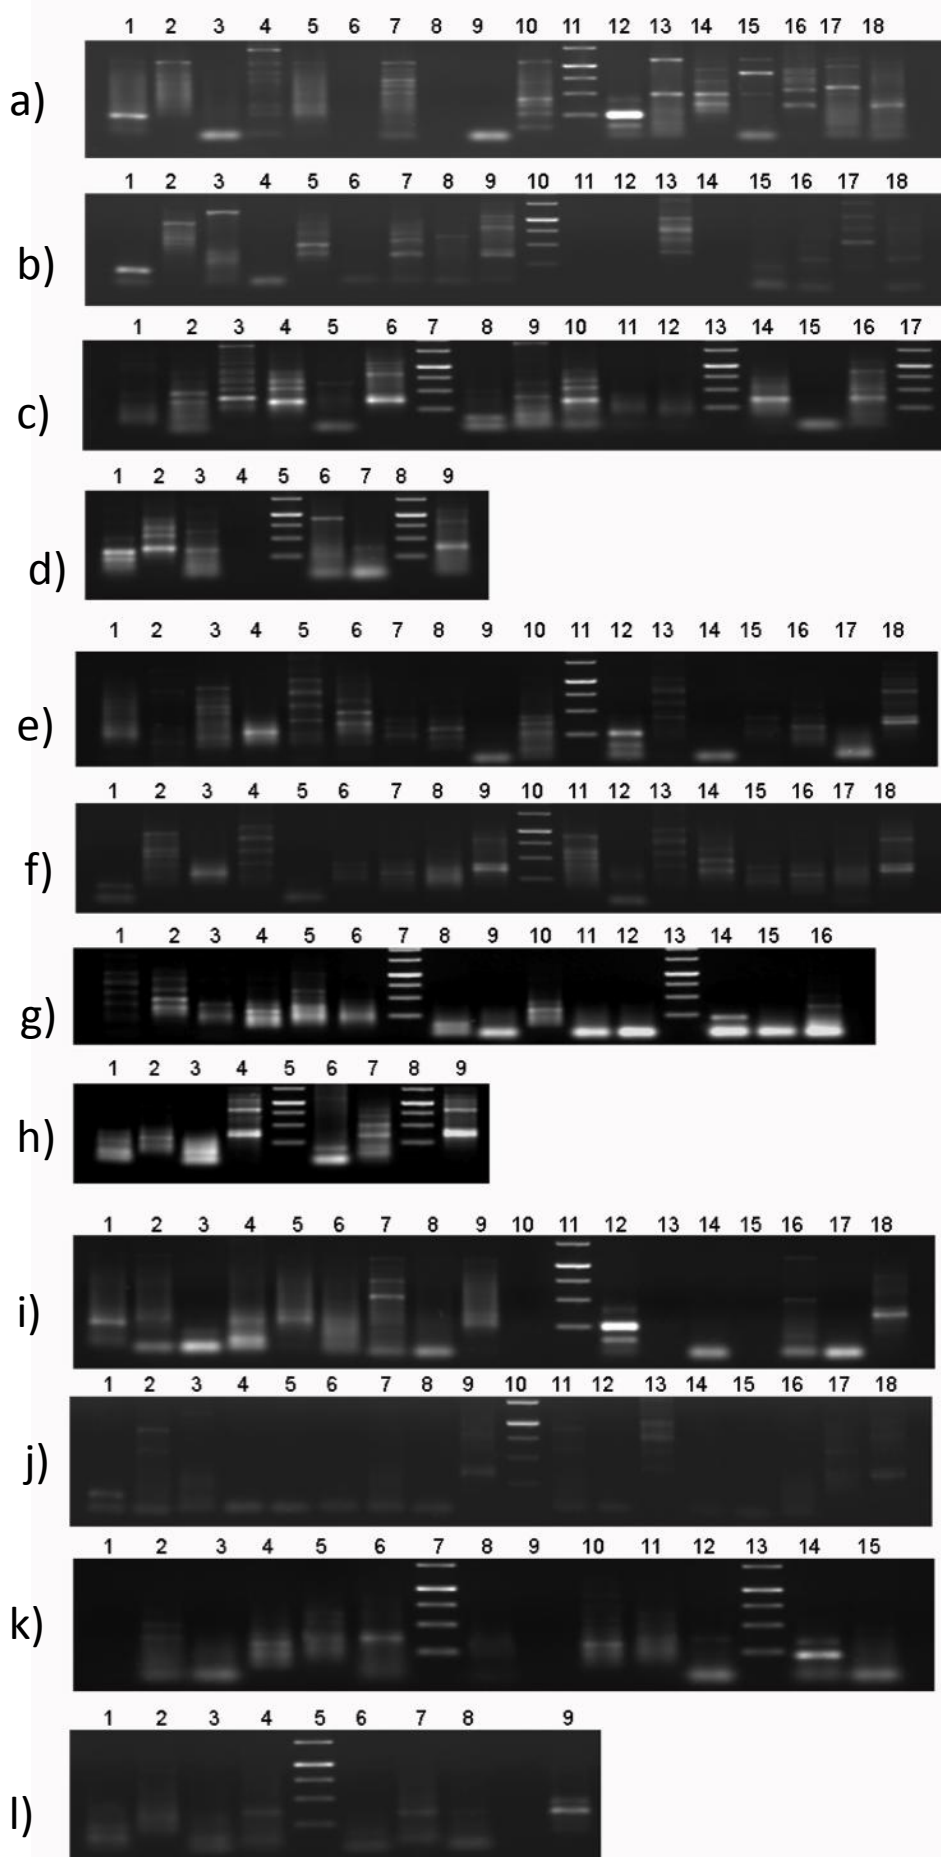

Figure S7(iii). 3C analysis of histone gene cluster during T-cell development.

a)

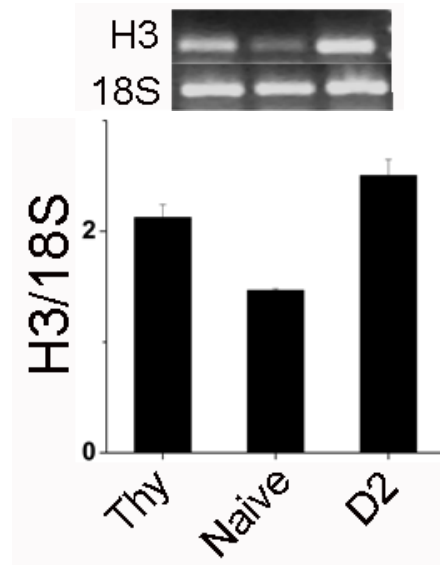

b)

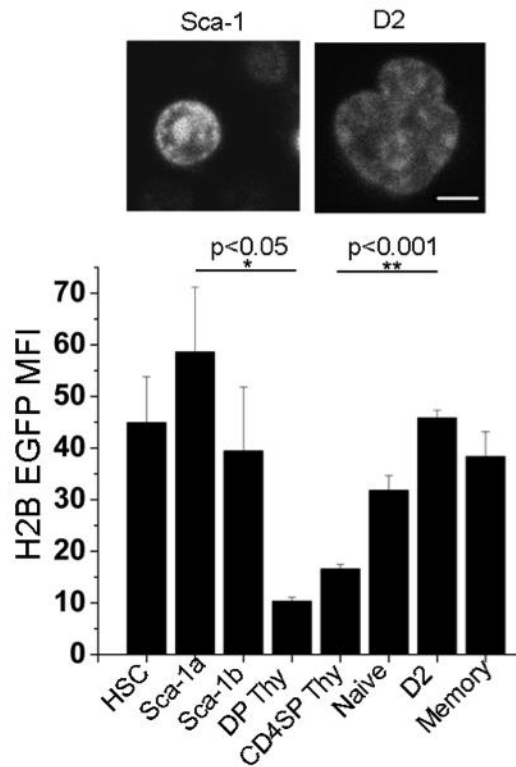

Figure S7(iv). 3C analysis of histone gene cluster during T-cell development.
